# Supplementary material for: Reliable prediction of n-heptane isomerization over Pt/(CrOx/ZrO2)-HMS via comparative assessment of regularization networks and surface response methodologies
Source: Royal Society of Chemistry journal article supplement (doi:10.1039/d0ra04313c), 2020-01-01
Supplement: d0ra04313c1.pdf [file d0ra04313c1.pdf]

## Supplementary Material

**Table S-1.** Empirical models suggested by CCD method for the first set of experiment.

| Actual Equation= $a+bX_1 + cX_2 + dX_1X_2+eX_1^2+fX_2^2+gX_1^2X_2 + hX_1X_2^2+iX_1^3 + jX_2^3$ |           |             |                                          |              |           |
|------------------------------------------------------------------------------------------------|-----------|-------------|------------------------------------------|--------------|-----------|
| X <sub>1</sub> : Temperature (°C)                                                              |           |             | X <sub>2</sub> : Molar ratio of catalyst |              |           |
| Coefficient                                                                                    | a         | b           | c                                        | d            | e         |
| Conversion                                                                                     | 52.87999  | 0.026473    | -1.71343                                 | -0.00645     | 0.000223  |
| MOB S. <sup>a</sup>                                                                            | 50.64618  | -0.276942   | -0.548246                                | -0.006226    | 0.000940  |
| MUB S.                                                                                         | 106.03750 | -1.90021    | -0.008195                                | 0.003237     | 0.003237  |
| i-C <sub>7</sub> S.                                                                            | 146.94111 | -1.02250    | -2.38141                                 | -0.012093    | 0.003610  |
| Crack S.                                                                                       | 17.29500  | 0.181367    | 2.97243                                  | 0.010488     | -0.000103 |
| RON                                                                                            | 65.10028  | -0.015558   | -8.17812                                 | -0.000327    | 0.000216  |
| Hydro S.                                                                                       | 25.03583  | -0.208100   | -0.038457                                | -0.000103    | 0.000440  |
| Coefficient                                                                                    | f         | g           | h                                        | i            | j         |
| Conversion                                                                                     | 0.144870  | 7.78026E-06 | 0.000098                                 | -5.35191E-07 | -0.002746 |
| MOB S.                                                                                         | 0.132558  | 4.87662E-06 | 0.000079                                 | -1.09431E-06 | -0.002908 |
| MUB S.                                                                                         | 0.224967  | 9.04762E-06 | 0.000068                                 | -4.00000E-06 | -0.004347 |
| i-C <sub>7</sub> S.                                                                            | 0.334956  | 0.000011    | 0.000128                                 | -4.26667E-06 | -0.006791 |
| Crack S.                                                                                       | -0.353533 | -0.000010   | -0.000095                                | -5.33333E-07 | 0.006933  |
| RON                                                                                            | 0.501172  | 0.000013    | -0.000144                                | -5.00000E-07 | -0.007798 |
| Hydro S.                                                                                       | 0.001136  | 0           | 0                                        | 0            | 0         |

<sup>a</sup>All the S. denotes for selectivity.

**Table S-2.** Empirical models suggested by CCD method for the second set of experiment.

| Actual Equation= $a+bX_1 + cX_2 + dX_1X_2+eX_1^2+fX_2^2+gX_1^2X_2 + hX_1X_2^2+iX_1^3 + jX_2^3$ |           |              |                                          |              |           |
|------------------------------------------------------------------------------------------------|-----------|--------------|------------------------------------------|--------------|-----------|
| X <sub>1</sub> : Time (hr)                                                                     |           |              | X <sub>2</sub> : Molar ratio of catalyst |              |           |
| Coefficient                                                                                    | a         | b            | c                                        | d            | e         |
| Conversion                                                                                     | 55.24823  | -0.117690    | -0.273136                                | 0.000828     | 0.000963  |
| MOB S. <sup>a</sup>                                                                            | 17.48370  | -0.017038    | -0.714765                                | 0.000692     | 0.000123  |
| MUB S.                                                                                         | 27.28079  | -0.062580    | -2.93383                                 | -0.000698    | 0.002332  |
| i-C <sub>7</sub> S.                                                                            | 44.07897  | -0.075749    | -3.45689                                 | -0.000058    | 0.002175  |
| Crack S.                                                                                       | 52.06788  | 0.111803     | 3.95475                                  | -0.000428    | -0.003420 |
| Hydro S.                                                                                       | 2.15170   | 0.024833     | -0.143399                                | -0.000246    | -0.000122 |
| Coefficient                                                                                    | f         | g            | h                                        | i            | j         |
| Conversion                                                                                     | 0.010898  | 0            | 0                                        | 0            | 0         |
| MOB S.                                                                                         | 0.079583  | -7.77475E-07 | -0.000015                                | -5.74609E-07 | -0.001624 |
| MUB S.                                                                                         | 0.201104  | -5.70967E-07 | 0.000019                                 | -0.000021    | -0.003516 |
| i-C <sub>7</sub> S.                                                                            | 0.269264  | -3.98688E-06 | 9.90713E-06                              | -0.000018    | -0.004955 |
| Crack S.                                                                                       | -0.288695 | 5.48439E-06  | -4.75965E-6                              | 0.000029     | 0.005164  |
| Hydro S.                                                                                       | 0.003160  | 0            | 0                                        | 0            | 0         |

<sup>a</sup>All the S. denotes for selectivity.

**Table S-3.** The significant terms of RSM models for both sets of experiments.

| X <sub>1</sub> : Temperature (°C)        |                             |         | X <sub>1</sub> : Time (hr)               |                             |         |
|------------------------------------------|-----------------------------|---------|------------------------------------------|-----------------------------|---------|
| X <sub>2</sub> : Molar ratio of catalyst |                             |         | X <sub>2</sub> : Molar ratio of catalyst |                             |         |
|                                          | Source                      | F-value |                                          | Source                      | F-value |
| Conversion                               | X <sub>2</sub>              | 34.46   | Conversion                               | X <sub>2</sub>              | 55.36   |
| MOB S. <sup>b</sup>                      | X <sub>2</sub> <sup>2</sup> | 56.18   | MOB S. <sup>b</sup>                      | X <sub>2</sub> <sup>2</sup> | 39632   |
| MUB S.                                   | X <sub>2</sub>              | 66.90   | MUB S.                                   | X <sub>2</sub>              | 349     |
| i-C <sub>7</sub> S.                      | X <sub>2</sub>              | 50.14   | i-C <sub>7</sub> S.                      | X <sub>2</sub> <sup>2</sup> | 3608    |
| Crack S.                                 | X <sub>2</sub>              | 45.25   | Crack S.                                 | X <sub>2</sub>              | 1484    |
| Hydro S.                                 | X <sub>1</sub>              | 76.52   | Hydro S.                                 | X <sub>2</sub> <sup>2</sup> | 17.33   |
| RON                                      | X <sub>2</sub>              | 403.11  | -                                        |                             |         |
